# Supplementary material
Source: PubMed Central journal article supplement (PMC8373009)

A.

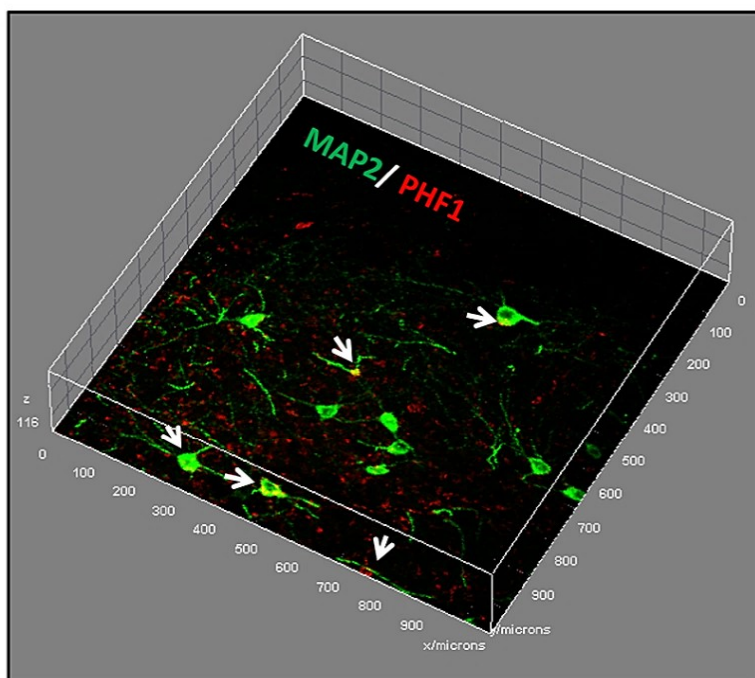

B.

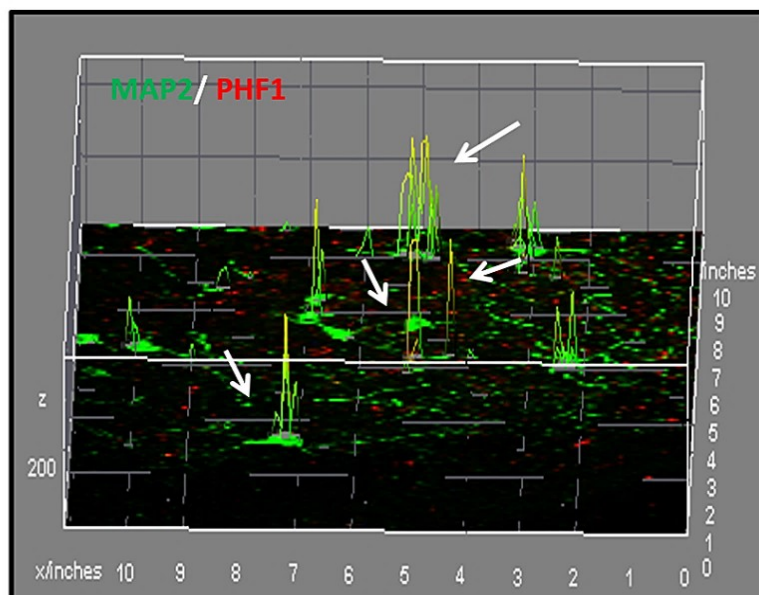

Supplement: NIHMS1065129-supplement-Supplementary_Figure_1.pdf [file NIHMS1065129-supplement-Supplementary_Figure_1.pdf]
